# Supplementary material
Source: PubMed Central journal article supplement (PMC2495071)
Supplement: mmc1.pdf [file mmc1.pdf]

**Supplemental Data**

***HLA-DRB1\*0401* and *HLA-DRB1\*0408* Are Strongly  
Associated with the Development of Antibodies  
against Interferon- $\beta$  Therapy in Multiple Sclerosis**

Steve Hoffmann, Sabine Cepok, Verena Grummel, Klaus Lehmann-Horn, Joerg Hackermueller, Peter F. Stadler, Hans-Peter Hartung, Achim Berthele, Florian Deisenhammer, Ralf Wasmuth, and Bernhard Hemmer

| Specificity |    | anti-IFN- $\beta$ assay |        |      |      |       |      |
|-------------|----|-------------------------|--------|------|------|-------|------|
| HLA         | N  | mean                    | median | sdev | p    | FDR   |      |
| A           | 1  | 84                      | 38     | 21.6 | 37.9 | 0.62  | 0.92 |
|             | 2  | 117                     | 39.6   | 25.9 | 37.4 | 0.95  | 0.95 |
|             | 3  | 92                      | 40.5   | 26.7 | 38.6 | 0.71  | 0.92 |
|             | 11 | 31                      | 47     | 38.6 | 38.5 | 0.15  | 0.68 |
|             | 23 | 11                      | 30.1   | 9.9  | 39.4 | 0.34  | 0.72 |
|             | 24 | 50                      | 39     | 23   | 39.5 | 0.79  | 0.92 |
|             | 25 | 17                      | 40.4   | 29.9 | 39   | 0.9   | 0.95 |
|             | 26 | 18                      | 35.5   | 27.3 | 32.5 | 0.69  | 0.92 |
|             | 29 | 15                      | 31.4   | 5.2  | 41.5 | 0.16  | 0.68 |
|             | 30 | 9                       | 33.8   | 16   | 38   | 0.78  | 0.92 |
|             | 31 | 9                       | 38.2   | 16   | 41.5 | 0.81  | 0.92 |
|             | 32 | 21                      | 45.9   | 38.6 | 39.5 | 0.45  | 0.85 |
|             | 33 | 4                       | 57.9   | 58.2 | 39.7 | 0.24  | 0.68 |
|             | 66 | 5                       | 13.4   | 7.7  | 10.8 | 0.32  | 0.72 |
|             | 68 | 17                      | 55.2   | 67.4 | 35.4 | 0.062 | 0.68 |
|             | B  | 7                       | 108    | 44.1 | 41.4 | 38.1  | 0.11 |
| 8           |    | 55                      | 36.1   | 18   | 38.3 | 0.36  | 0.63 |
| 13          |    | 14                      | 21.1   | 7    | 34.8 | 0.07  | 0.34 |
| 14          |    | 8                       | 58.1   | 52.8 | 28   | 0.12  | 0.34 |
| 15          |    | 43                      | 37.8   | 20   | 38.8 | 0.34  | 0.63 |
| 18          |    | 28                      | 27.8   | 13.7 | 34.4 | 0.14  | 0.34 |
| 27          |    | 24                      | 54.8   | 58.7 | 44.9 | 0.06  | 0.34 |
| 35          |    | 45                      | 38.9   | 33   | 38.5 | 0.75  | 0.83 |

|    |           |             |             |             |             |             |             |
|----|-----------|-------------|-------------|-------------|-------------|-------------|-------------|
| 37 | 13        | 37.1        | 43.4        | 32          | 0.8         | 0.83        |             |
| 38 | 4         | 24.2        | 17          | 29.9        | 0.39        | 0.63        |             |
| 39 | 15        | 55.2        | 59.8        | 41.8        | 0.13        | 0.34        |             |
| 40 | 28        | 35.1        | 23.9        | 34.4        | 0.5         | 0.63        |             |
| 41 | 7         | 20.9        | 16          | 20.2        | 0.5         | 0.63        |             |
| 44 | 39        | 37.6        | 21.7        | 38.2        | 0.49        | 0.63        |             |
| 45 | 2         | 39.4        | 39.4        | 6.1         | 0.8         | 0.83        |             |
| 49 | 8         | 28.7        | 9.7         | 39.8        | 0.38        | 0.63        |             |
| 50 | 5         | 11.2        | 7.2         | 14.4        | 0.14        | 0.34        |             |
| 51 | 38        | 43.6        | 33.4        | 39.4        | 0.42        | 0.63        |             |
| 52 | 3         | 55.1        | 58.9        | 50          | 0.45        | 0.63        |             |
| 55 | 4         | 39.5        | 32.6        | 38          | 0.86        | 0.86        |             |
| 56 | 4         | 17.8        | 14.6        | 10.5        | 0.62        | 0.74        |             |
| 57 | <b>10</b> | <b>67.2</b> | <b>77.6</b> | <b>41</b>   | <b>0.03</b> | <b>0.34</b> |             |
| C  | 1         | 10          | 24.2        | 11.2        | 31.1        | 0.29        | 0.54        |
|    | 2         | <b>29</b>   | <b>53.8</b> | <b>47.2</b> | <b>42.3</b> | <b>0.03</b> | <b>0.19</b> |
|    | 3         | 56          | 38.4        | 23.4        | 37.5        | 0.56        | 0.73        |
|    | 4         | 57          | 36.2        | 19.1        | 37.1        | 0.34        | 0.55        |
|    | 5         | 18          | 25.3        | 16.1        | 28.9        | 0.16        | 0.42        |
|    | 6         | 45          | 37.9        | 35.1        | 36.9        | 0.81        | 0.94        |
|    | 7         | 168         | 42.3        | 34.9        | 38.5        | 0.26        | 0.54        |
|    | 8         | 8           | 58.1        | 52.8        | 28          | 0.12        | 0.42        |
|    | 12        | 31          | 42.5        | 28.3        | 40          | 0.49        | 0.71        |
|    | 14        | 5           | 60.6        | 47.8        | 24.5        | 0.16        | 0.42        |
|    | 15        | 24          | 40          | 18.9        | 39          | 0.87        | 0.94        |
|    | 16        | <b>16</b>   | <b>21.1</b> | <b>3</b>    | <b>40</b>   | <b>0.01</b> | <b>0.1</b>  |
|    | 17        | 9           | 32.7        | 17.4        | 31.9        | 0.97        | 0.97        |

**Table S1.** Analysis of anti-IFN $\beta$  for MHCI specificity. While significant differences (highlighted) can be seen in single tests for *HLA-C\*16*, *HLA-C\*2* and *HLA-B\*57*, significance vanishes after FDR correction.
